# Supplementary material
Source: ML conference proceedings conference paper supplement (https://openreview.net/forum?id=pwRVGRWtGg)
Supplement: supplementary_material [file attachment]

## Sheet: Raw
	Info	Angry_F1S1	Angry_F1S1	Angry_F1S1	Angry_F1S1	Angry_F1S1	Angry_F1S1	Angry_F1S1	Angry_F1S2	Angry_F1S2	Angry_F1S2	Angry_F1S2	Angry_F1S2	Angry_F1S2	Angry_F1S2	Angry_F1S3	Angry_F1S3	Angry_F1S3	Angry_F1S3	Angry_F1S3	Angry_F1S3	Angry_F1S3	Angry_F1S4	Angry_F1S4	Angry_F1S4	Angry_F1S4	Angry_F1S4	Angry_F1S4	Angry_F1S4	Angry_F1S5	Angry_F1S5	Angry_F1S5	Angry_F1S5	Angry_F1S5	Angry_F1S5	Angry_F1S5	Angry_F2S1	Angry_F2S1	Angry_F2S1	Angry_F2S1	Angry_F2S1	Angry_F2S1	Angry_F2S1	Angry_F2S2	Angry_F2S2	Angry_F2S2	Angry_F2S2	Angry_F2S2	Angry_F2S2
0	Gender:	Male	Female	Female	Male	Female	Male	Male	Female	Female	Male	Male	Female	Female	Female	Female	Male	Female	Female	Male	Female	Male	Male	Male	Male	Female	Male	Female	Female	Male	Male	Female	Female	Female	Female	Male	Female	Female	Male	Female	Male	Female	Male	Female	Male	Female	Female	Male	Male
1	Year of Birth: - Year - Please Select:	1995	1985	1986	1994	1951	1952	1946	1988	1984	1954	1993	1989	1955	1957	1987	1990	1978	1995	1968	1976	1989	1979	1961	1992	1984	1984	1997	1989	1989	1978	2001	1969	1999	1973	1996	1990	1982	1990	1972	1966	1971	1977	1990	1950	1971	1983	1997	1985
2	Which country are you from?	United Kingdom	United Kingdom	United Kingdom	United Kingdom	United Kingdom	United Kingdom	United Kingdom	Ireland	United Kingdom	United Kingdom	United Kingdom	United Kingdom	United Kingdom	United Kingdom	United Kingdom	United Kingdom	Ireland	United Kingdom	United Kingdom	United Kingdom	United Kingdom	United Kingdom	United Kingdom	United Kingdom	United Kingdom	United Kingdom	United Kingdom	United Kingdom	United Kingdom	United Kingdom	Australia	United Kingdom	United Kingdom	United Kingdom	South Africa	United Kingdom	United Kingdom	United Kingdom	India	United States	United Kingdom	United Kingdom	Australia	United Kingdom	United Kingdom	United Kingdom	United Kingdom	United Kingdom
3	Employment Status:	Employed	Employed	Employed	Employed	Retired	Retired	Retired	Employed	Employed	Retired	Employed	Employed	Employed	Retired	Employed	Employed	Unemployed	Employed	Employed	Student	Employed	Employed	Retired	Employed	Unemployed	Employed	Employed	Employed	Employed	Unemployed	Student	Employed	Employed	Unemployed	Employed	Employed	Employed	Unemployed	Unemployed	Unemployed	Employed	Employed	Employed	Retired	Employed	Employed	Employed	Employed
4	Education attainment	University - Masters	Upper secondary school	Upper secondary school	Upper secondary school	University - Masters	Upper secondary school	Upper secondary school	University - Bachelors	Lower secondary school	Upper secondary school	University - Masters	Upper secondary school	University - Masters	Upper secondary school	University - Bachelors	Upper secondary school	Upper secondary school	Upper secondary school	Upper secondary school	University - Masters	University - Bachelors	Upper secondary school	Lower secondary school	Upper secondary school	Upper secondary school	Upper secondary school	University - Bachelors	University - Bachelors	Upper secondary school	Upper secondary school	Upper secondary school	University - Bachelors	University - Masters	University - Bachelors	University - Bachelors	University - Masters	University - Masters	Upper secondary school	University - Bachelors	Upper secondary school	Upper secondary school	University - Bachelors	University - Bachelors	Upper secondary school	University - Bachelors	Upper secondary school	Upper secondary school	Upper secondary school
5	Please indicate the extent of your current feeling in the following emotions: - Interested	1	5	3	4	3	3	4	3	3	4	1	5	4	5	4	3	4	3	3	1	2	3	4	2	4	2	5	2	2	4	2	4	4	4	3	3	4	4	5	2	4	2	2	4	4	4	3	3
6	Please indicate the extent of your current feeling in the following emotions: - Distressed	2	1	1	1	1	1	1	1	1	1	1	1	1	1	1	4	1	1	1	3	1	1	1	1	1	1	1	3	4	2	2	1	2	1	2	1	1	1	1	1	1	1	1	2	2	1	1	1
7	Please indicate the extent of your current feeling in the following emotions: - Excited	2	3	4	3	1	2	2	1	1	3	1	4	1	2	3	1	1	1	1	1	3	3	1	1	1	1	5	1	2	2	1	1	3	2	3	3	3	2	4	3	1	1	2	3	3	1	3	2
8	Please indicate the extent of your current feeling in the following emotions: - Upset	2	1	1	1	1	1	1	1	1	1	1	1	1	1	1	4	1	1	1	1	2	1	1	1	1	1	1	4	4	2	2	2	1	1	2	1	4	1	1	1	1	2	1	2	1	1	1	1
9	Please indicate the extent of your current feeling in the following emotions: - Strong	1	3	4	4	3	4	3	2	3	3	1	4	3	3	3	3	1	3	2	3	5	2	1	2	3	2	4	3	1	3	1	3	4	4	3	3	1	1	4	4	2	1	2	4	3	4	2	2
10	Please indicate the extent of your current feeling in the following emotions: - Guilty	1	1	1	2	1	1	1	1	2	1	1	1	1	1	3	1	1	1	2	1	1	2	1	1	1	1	1	2	5	1	3	1	2	1	2	1	1	1	1	1	1	1	1	2	1	1	1	1
11	Please indicate the extent of your current feeling in the following emotions: - Scared	1	1	1	1	1	1	1	1	1	1	1	1	1	1	3	1	1	1	1	1	1	1	1	1	1	1	1	2	4	2	2	1	1	1	1	1	1	1	1	1	1	1	1	2	1	1	2	1
12	Please indicate the extent of your current feeling in the following emotions: - Hostile	3	1	1	1	1	1	1	1	1	1	2	1	1	1	3	3	1	1	1	1	1	1	1	1	1	1	1	4	5	1	1	1	1	1	1	1	1	1	1	1	1	3	1	2	1	1	1	1
13	Please indicate the extent of your current feeling in the following emotions: - Enthusiastic	1	4	4	4	3	3	4	3	3	3	1	5	3	3	3	2	1	1	1	2	2	2	3	2	2	1	4	1	1	1	1	2	4	4	2	4	4	2	4	4	3	2	2	4	3	2	3	2
14	Please indicate the extent of your current feeling in the following emotions: - Proud	1	2	5	4	4	2	3	3	3	4	1	4	3	4	2	1	1	2	1	4	1	2	1	3	2	1	5	1	1	1	1	1	4	4	3	4	5	2	3	4	2	1	2	4	3	1	3	3
15	Please indicate the extent of your current feeling in the following emotions: - Irritable	5	1	2	3	1	1	1	1	1	1	2	1	2	1	3	5	2	2	1	4	1	2	2	1	1	1	1	5	4	1	2	1	1	2	4	2	1	3	1	1	1	4	1	3	1	3	2	3
16	Please indicate the extent of your current feeling in the following emotions: - Alert	1	5	4	4	4	4	4	4	3	3	1	4	4	5	3	4	2	3	2	1	1	3	4	2	3	2	1	4	3	4	1	2	3	4	3	4	4	2	5	5	3	2	1	4	2	4	3	2
17	Please indicate the extent of your current feeling in the following emotions: - Ashamed	1	1	1	3	1	1	1	1	2	1	1	1	2	1	1	1	1	1	1	1	1	1	1	1	1	1	1	1	5	1	1	1	1	1	2	1	1	1	1	1	1	1	1	3	1	1	1	1
18	Please indicate the extent of your current feeling in the following emotions: - Inspired	1	4	4	4	3	2	3	1	3	3	1	4	2	4	4	1	2	1	1	2	1	2	1	1	1	1	3	1	1	2	1	1	3	3	3	4	3	1	4	4	1	1	1	4	2	1	3	2
19	Please indicate the extent of your current feeling in the following emotions: - Nervous	1	1	2	2	1	1	1	1	1	1	1	1	1	1	3	2	2	1	2	1	1	1	1	2	1	1	1	4	4	1	3	2	2	1	1	1	4	2	1	1	1	1	1	2	1	1	3	1
20	Please indicate the extent of your current feeling in the following emotions: - Determined	1	5	4	4	3	3	4	4	5	3	1	5	4	4	4	2	2	1	1	4	3	2	3	1	1	1	2	3	2	1	1	2	3	4	3	4	5	3	5	3	3	2	2	4	3	3	3	2
21	Please indicate the extent of your current feeling in the following emotions: - Attentive	1	5	5	3	5	4	5	4	3	4	1	5	4	5	3	2	3	1	2	4	2	3	4	2	3	3	2	4	1	5	3	4	4	5	2	4	5	3	5	3	4	2	2	3	3	3	4	1
22	Please indicate the extent of your current feeling in the following emotions: - Jittery	1	1	1	1	1	1	1	1	1	1	1	1	1	1	4	3	2	1	2	1	1	1	1	1	1	1	1	5	4	1	1	1	1	1	1	1	4	1	1	1	2	1	1	3	1	1	2	1
23	Please indicate the extent of your current feeling in the following emotions: - Active	2	5	3	2	4	3	3	3	3	4	1	3	4	3	3	3	2	1	1	1	2	2	2	2	1	2	5	2	2	4	2	2	4	3	2	5	1	1	4	4	2	1	1	3	3	3	3	1
24	Please indicate the extent of your current feeling in the following emotions: - Afraid	1	1	2	1	1	1	1	1	1	1	1	1	1	1	2	1	1	1	1	1	1	1	1	1	1	1	1	2	4	1	3	2	1	1	1	1	1	1	1	1	1	1	1	2	1	1	2	1
25	Please indicate the extent of your feeling in the following emotions: - Interested	1	2	3	2	1	3	3	3	5	2	1	5	4	2	1	2	3	4	4	1	2	2	4	1	1	1	2	3	2	1	3	4	1	4	4	2	3	2	4	4	5	1	1	4	3	1	4	4
26	Please indicate the extent of your feeling in the following emotions: - Distressed	2	4	3	4	4	2	3	3	1	2	3	1	2	1	4	3	3	5	5	1	2	2	2	3	4	2	5	5	4	3	4	2	4	3	2	4	5	5	2	5	5	4	4	5	1	2	4	4
27	Please indicate the extent of your feeling in the following emotions: - Excited	1	1	2	1	1	1	2	1	5	2	1	4	1	1	1	2	2	1	1	1	1	1	2	1	1	2	1	1	2	1	2	2	1	4	1	1	1	1	3	3	1	1	1	1	1	1	1	1
28	Please indicate the extent of your feeling in the following emotions: - Upset	3	4	4	4	4	3	3	4	1	2	3	1	2	1	5	4	2	5	5	1	2	4	3	4	4	2	4	5	4	2	4	3	4	3	4	5	5	5	3	5	5	4	5	5	2	3	5	4
29	Please indicate the extent of your feeling in the following emotions: - Strong	1	1	2	3	3	2	4	2	4	3	1	3	3	4	1	4	1	2	3	3	3	3	1	3	1	2	2	4	1	2	2	2	2	4	4	1	4	2	5	5	4	3	1	2	2	1	1	1
30	Please indicate the extent of your feeling in the following emotions: - Guilty	1	3	1	3	1	1	1	1	1	1	1	1	1	1	2	1	1	1	1	1	1	1	1	1	1	1	1	1	5	1	3	1	2	2	2	2	1	1	1	1	1	2	2	1	1	1	1	3
31	Please indicate the extent of your feeling in the following emotions: - Scared	1	2	2	4	1	1	1	3	1	1	1	1	1	1	3	1	1	1	1	1	1	1	1	2	3	1	1	2	4	3	3	2	3	2	1	5	3	5	4	1	4	4	4	3	1	1	5	4
32	Please indicate the extent of your feeling in the following emotions: - Hostile	4	4	4	4	2	2	2	3	1	2	3	1	2	1	3	4	2	3	3	1	2	3	2	3	3	2	4	5	5	4	3	2	1	3	1	4	5	2	3	5	3	4	2	4	1	1	2	4
33	Please indicate the extent of your feeling in the following emotions: - Enthusiastic	1	1	2	2	3	1	3	3	5	3	1	4	3	3	1	4	2	1	5	2	2	2	3	4	1	1	1	2	2	1	2	2	2	4	3	1	1	1	4	1	2	1	1	2	1	1	1	1
34	Please indicate the extent of your feeling in the following emotions: - Proud	1	1	2	2	2	1	4	2	3	2	1	4	1	3	1	4	1	1	1	4	1	2	1	1	1	1	1	1	1	2	1	1	1	3	1	1	1	4	5	4	1	1	1	1	1	1	1	1
35	Please indicate the extent of your feeling in the following emotions: - Irritable	4	5	4	4	4	4	2	2	1	2	3	1	4	1	5	5	3	5	5	4	3	4	3	5	4	3	5	5	5	4	3	3	5	4	4	4	4	4	3	5	4	5	3	4	2	4	4	4
36	Please indicate the extent of your feeling in the following emotions: - Alert	1	3	4	3	4	2	4	4	5	3	1	3	4	5	5	3	3	4	5	1	2	3	4	4	4	2	2	4	4	4	3	3	4	4	4	2	5	5	5	5	4	2	3	4	2	3	4	2
37	Please indicate the extent of your feeling in the following emotions: - Ashamed	1	2	2	4	1	1	1	1	1	1	1	1	1	1	1	1	1	3	1	1	1	1	1	1	2	1	1	1	5	1	2	1	1	2	2	4	1	2	1	1	1	3	2	2	1	1	4	3
38	Please indicate the extent of your feeling in the following emotions: - Inspired	1	1	1	2	3	1	2	1	3	2	1	3	3	1	1	4	2	1	2	2	2	2	1	3	1	1	1	2	2	1	1	1	2	4	1	1	1	1	4	5	1	1	1	2	1	1	1	1
39	Please indicate the extent of your feeling in the following emotions: - Nervous	1	2	2	4	1	1	1	3	2	1	1	1	1	1	4	1	2	1	2	1	2	1	1	2	1	1	2	5	4	2	4	3	4	2	2	5	4	5	3	1	4	4	4	4	2	1	5	4
40	Please indicate the extent of your feeling in the following emotions: - Determined	1	2	2	3	4	3	5	3	5	3	1	4	3	4	4	5	4	4	5	4	2	4	3	5	1	3	2	5	2	2	2	3	2	3	1	4	5	5	5	5	5	1	2	4	1	1	2	4
41	Please indicate the extent of your feeling in the following emotions: - Attentive	1	2	2	3	4	2	4	4	3	3	1	5	4	4	4	3	3	3	5	3	1	3	4	2	1	2	1	5	4	4	3	4	1	4	3	2	5	4	5	5	4	1	2	4	1	1	4	3
42	Please indicate the extent of your feeling in the following emotions: - Jittery	1	2	3	4	1	1	1	2	2	1	1	1	1	1	4	2	3	3	5	1	1	1	1	4	2	1	2	5	4	2	1	2	2	2	2	4	4	4	3	1	4	4	2	4	1	1	5	3
43	Please indicate the extent of your feeling in the following emotions: - Active	1	2	3	2	4	2	3	2	3	3	1	3	4	3	4	4	3	1	5	1	2	3	3	4	1	3	1	4	2	1	2	4	2	4	2	1	3	4	4	5	3	1	1	4	1	1	2	3
44	Please indicate the extent of your feeling in the following emotions: - Afraid	2	2	4	4	1	1	1	1	1	2	1	1	1	1	2	1	2	2	1	1	1	1	1	2	3	1	1	3	4	1	3	3	3	1	2	5	3	5	2	1	4	4	3	4	1	1	5	4
	Positive Affect(General)	12	41	40	36	33	30	35	28	30	34	10	43	32	38	32	22	19	17	15	23	22	24	24	18	21	16	36	22	16	27	14	22	36	37	27	38	35	21	43	36	25	15	17	37	29	26	30	20
	Negative Affect(General)	18	10	13	16	10	10	10	10	12	10	12	10	12	10	24	25	13	11	13	15	11	12	11	11	10	10	10	32	43	13	20	13	13	11	17	11	19	13	10	10	11	16	10	23	11	12	16	12
	Positive Affect(After Scenario)	10	16	23	23	29	18	34	25	41	26	10	38	30	30	23	35	24	22	36	22	18	25	26	28	13	18	14	31	22	19	21	26	18	38	24	16	29	29	44	42	30	13	14	28	14	12	21	21
	Negative Affect(After Scenario)	20	30	29	39	20	17	16	23	12	15	18	10	16	10	33	23	20	29	29	13	16	19	16	27	27	15	26	37	44	23	30	22	29	24	22	42	35	38	25	26	35	38	31	36	13	16	40	37
	Positive Diff	-2	-25	-17	-13	-4	-12	-1	-3	11	-8	0	-5	-2	-8	-9	13	5	5	21	-1	-4	1	2	10	-8	2	-22	9	6	-8	7	4	-18	1	-3	-22	-6	8	1	6	5	-2	-3	-9	-15	-14	-9	1
	Negative Diff	2	20	16	23	10	7	6	13	0	5	6	0	4	0	9	-2	7	18	16	-2	5	7	5	16	17	5	16	5	1	10	10	9	16	13	5	31	16	25	15	16	24	22	21	13	2	4	24	25
[truncated: 1,218 more columns]

## Sheet: Summary
Crowd Overall
Positive Affect	Statistic							F-test		Paired T-test
	s1_mean	s1_sd	s1_n	s2_mean	s2_sd	s2_n	α	F-value	p-value	d.f.	t-value	p-value (2-tailed)	p-value (1-tailed)
	22.8902	8.66832	1266	28.019	8.66832	1266	0.01	1	1	1265	-20.675	0	0
									equal var			u1 != u2	u1 < u2
Negative Affect	Statistic							F-test		Paired T-test
	s1_mean	s1_sd	s1_n	s2_mean	s2_sd	s2_n	α	F-value	p-value	d.f.	t-value	p-value (2-tailed)	p-value (1-tailed)
	24.0529	9.74908	1266	13.6177	5.49761	1266	0.01	3.14471	0	1265	38.6178	0	0
									unequal var			u1 != u2	u1 > u2
	Overall	Anger	Anxiety	Depression	Frustration	Jealousy	Guilt	Fear	Embarrassment
Positive Affect	↓	↓	↓	↓	↓	↓	↓	↓	↓
	-5.12875	-5.25989	-2.22378	-6.76471	-5.27778	-4.3945	-6.31507	-3.67582	-6.16667
Negative Affect	↑	↑	↑	↑	↑	↑	↑	↑	↑
	10.4352	9.85876	9.32432	10.0588	10.9097	6.18349	13.0822	12.0604	11.0903
