# Supplementary material
Source: ML conference proceedings conference paper supplement (https://openreview.net/forum?id=pwRVGRWtGg)
Supplement: supplementary_material [file situations.xlsx]

## Sheet: Raw
Emotion	Anger	Anger	Anger	Anxiety	Anxiety	Anxiety	Depression	Frustration	Jealousy	Jealousy	Jealousy	Guilt		Guilt	Fear	Fear	Fear	Embarrassment	Embarrassment
Reference	The angry cognitions scale: a new inventory for assessing cognitions in anger	Anger amongst New Zealand driver	What is anger provoking? A psychophysical study of perceived causes of anger	Exposure to a Standardized Catastrophic Scenario in Virtual Reality or a Personalized Scenario in Imagination for Generalized Anxiety Disorder	Interactions among situations, neuroticism, and appraisals in coping strategy choice	“My cheeks get red and my brain gets scared”: A computer assisted interview to explore experiences of anxiety in young children on the autism spectrum	Is low mood an adaptation? Evidence for subtypes with symptoms that match precipitants	Developing a measure of interpretation bias for depressed mood: An ambiguous scenarios test	Why are some people more jealous than others? Genetic and environmental factors	When employees feel envy: The role of psychological capital	Person vs. purchase comparison: how material and experiential purchases evoke consumption-related envy in others	The wide variety of reasons for feeling guilty in adults: findings from a large cross-sectional web-based survey		Comprehensive neural networks for guilty feelings in young adults	Fear Survey Schedule	Human defensive behaviors to threat scenarios show parallels to Fear- and anxiety-related defense patterns of non-human mammals	The psychophysiology of anxiety disorder: Fear memory imagery	Shame and Embarrassment Revisited	Who is Embarrassed by What?
Context	1. You are driving through a residential area when someone backs their car out of the driveway and nearly hits you.	Discourtesy	Factor I: self-opinionated people	1. Emergency Room:This environment was created with the intention of eliciting worry in participants suffering mostly from worries related to health. The participant was immersed in a hospital emergency waiting room. Other patients are nearby and display symptoms of sickness (coughing) or fatigue. One is wearing a disposable face mask. Sounds are heard, such as a mother crying after receiving bad…	Uncontrollability and threatening	1. When you are the centre of attention	1. Failure at an important goal	1. Your friend is in a coma after an accident.	Thinking about your feelings during all previous relationships, please rate how uncomfortable would you be if your partner did the following with an unrelated member of the opposite-sex...	This scenario is a story related to your colleague (Pat) and a manager in your team. Pat is your colleague and Pat and you work together with the manager on the team for a year. Both of you do the same task and report to the same manager. Please read the following scenario, imagining that this is your current experience with your manager and colleague (Pat). After being late twice last month, Pat…	1. Imagine that you just bought a new laptop and you are happy with all its new features and its superior speed, screen resolution, and memory capacity. You paid $1150 for the laptop and shared about your new laptop on social media. Now imagine that an acquaintance approaches you and says, "I saw your post online. Nice laptop! I just got the same one. I got a nice deal and paid $650 for mine. How…	1 Feelings of guilt related to partner/spouse			Social Fears (SOC)	(1) You are walking alone in an isolated but familiar area when a menacing stranger suddenly jumps out of the bushes to attack you.	Standard Fear scenes	Study 1 (odd: shame, even: embarrassment)	Intimate
	2. Your new roommate doesn’t clean up the kitchen after having some friends over.	5. Someone is driving very close to your rear bumper	6. When I discuss my opinions with some older person and they don’t take them seriously, very often I get some irritating answers. My opinions are not considered.	2. Apartment: The setting for this scenario is an apartment that participants are invited to visit. Participants first overhear a conversation taking place behind closed doors suggesting that an accident has occurred. Afterwards, a special announcement is made on the radio regarding recent burglaries in the neighborhood. At the same time, a rock is thrown at the window, and when the participant l…	1.I do not have control over this situation	2. When you don’t know what people think of you	2. Death of a loved one	2. A friend lets you down on a date, and calls you the following day to let you know that he/she didn't feel like meeting with you and went out with other people instead.	1. Provided/received emotional support	1. After Pat’s meeting, I also talked with the manager. I was embarrassed because the manager didn’t give me a chance to explain why I could not attend the meeting. The manager with a serious look on his face said to me: “Do you know why I called you out? You were late to the meeting and it was an important meeting with the department director. You had been late to work twice last month. At that …	2. Imagine that you just went on a vacation to Patagonia in South America and you are happy with all of the activities and experiences that you participated in. You paid $1150 for the vacation and shared about your vacation on social media. Now imagine that an acquaintance approaches you and says, "I saw your post online. Nice vacation! I just went on the same one. I got a nice deal and paid $650…	1.1 Divorce/break up	“Breaking-up with partner.”; “Leaving my wife for a colleague.”	1.I deceived my friend.	5. Speaking in public	(2) You are alone in an elevator late at night. As it stops and the doors open, a menacing stranger rushes in to attack you, blocking the door.	1. My heart pounds in the suddenly silent room; everyone is watching me, waiting impatiently to hear what I will say.	1. You take a job and are in the process of moving into the office vacated by your predecessor. One of your coworkers, who happens to be the boss’ daughter, stops by and offers to help you. She helps you carry a box. As she puts it down, the lid falls off. She hesitates and then picks up a pornographic magazine, featuring children in explicit sexual acts. She looks at you with a mixture of surpri…	1. One evening, two months after our marriage, my wife and I decided to invite our parents to dinner at our apartment. This was the first time we had invited any of them over for dinner for Embarrass of revealing our shaky culinary skills. We had planned to make lasagne, and had asked a good friend for a trusted recipe. She had written it out on an index card, and we had painstakingly followed ea…
	3. Someone bumps into you at the mall and doesn’t apologize.	7. Someone cuts in right in front of you on the motorway	9. If somebody talks back when there’s no reason. That there is no real reason to oppose.	3. Student Room: The third environment, created for students, alludes to both academic difficulties and social isolation. The participant is in his or her room having to study for upcoming exams. Scattered unpaid bills are visible and suggest financial difficulties. Voices are heard coming from the hall, talking about a student who is failing out of the program. Roommates heard from another room …	2.I can not change an outcome	3. When there is a change in routine	3. Romantic loss	3. A friend returns your CD player, claiming that everything is OK, but it turns out to be broken afterwards.	2. Conversational messages/emails	2. After Pat’s meeting, I also talked with the manager. The manager asked me about the reason of having missed the meeting and gave me a last verbal warning like pat.	3. Imagine that an acquaintance approaches you and says, "I just got a new laptop with superior speed, screen resolution, and memory capacity. I got a nice deal and paid $650 for it."	1.2 Cheating/having affair(s)	“I cheated on my husband.”; “I kissed a woman other than my partner.”	2. I hurt my friend.	8. Being teased	(3) You are alone in a car on your way home. While stopped at a traffic signal, an angry stranger begins banging on your car window and yelling threatening things at you.	2. I’m wrong. They say, ‘‘Stupid! You never get anything right!’’; my face is hot, and I have to stand there and take it.	2. After a hectic day of classes, you go to a restaurant on campus. You sit down and order a rather large meal. You eat slowly and order a second and third drink. When the waiter brings the check, you discover that your wallet is missing. You frantically look through your pockets, then your coat and your book bag. You realize that you left your wallet on your desk.	3. (For this item, imagine yourself male.) I had been working with Ellen for about six months on several projects. She was an excellent team member, and we got along well, but she seemed overly friendly, and it made me a bit uncomfortable, When she invited me over for dinner, I realised I would have to talk about it with her. So I accepted the invitation with the plan of clarifying our relationsh…
	4. You get home from the drive-thru and realize that you were given the wrong food.	8. Someone cuts in and takes the parking spot you have been waiting for	11. If some older people like your parents are discussing something and you want to join in and they say you wouldn’t understand. Sometimes they say you have to understand. Some other times you’re too young. It doesn’t matter if you’re young you can understand anyway.		3.I cannot cope witht this situation	4. When you are not prepared	4. Chronic stress	4. A swimming appointment is cancelled because one of your friends falls ill.	3. Complimented appearance		4. Imagine that an acquaintance approaches you and says, "I just went on a vacation to Patagonia in South America. I got a nice deal and paid $650 for it."	1.3 Changing/lacking feelings in relationship/marriage	“I started a relationship without feelings.”; “I don’t love my husband and just stand everything.”	3. I uncovered my friend's secret.	9. Failure	(4) Driving along a two-lane road, you see in your rearview mirror that a car is dangerously tailgating you. They cannot pass and begin honking their horn aggressively at you while continuing to follow too closely.	3. I flinch at the screech of brakes; my companion is struck by a speeding car: Her leg is crushed, bone protruding, and blood pumps onto the road.	3. Your history professor has agreed to give your class a take-home essay exam so that you can be finished before finals week, provided that you won’t discuss the exam with anyone. Your roommate is in the same class and has already written his test by Sunday afternoon. You start Sunday and cannot come up with anything intelligent to say. You glance over at your roommate’s desk and see his complet…	8. I had been forced to apply for food stamps. The agency told me that I would have to have a home visit by a social worker before I could receive the stamps. The visit was arranged for a Wednesday afternoon at 1.00. Just at 1.00 my door bell rang and when I answered the door, I discovered standing there my college room-mate.
	5. You are stuck behind a slow driver on an otherwise open road.	12. Someone backs out right in front of you without looking	15. When somebody says something they think is right, but I know it’s wrong and they won’t admit they’re wrong. Their stubbornness, not wanting to confess to a mistake.		4.I do not know what to do in this situation	5. When you are away from your parents	5. Social isolation	5. The waiter in a restaurant informs you that it may take a while before you can eat because it is a busy evening. Finally, you are served after 50 minutes of waiting.	4. Touched while talking			1.4 Problems/issues in relationship/marriage (general; other than 1.1–1.3)	“Neglected my husband.”; “Spending too much time for own interests in marriage.”	4. I broke a promise.	10. Entering a room where other people are already seated	(5) It is past midnight and you are walking through an unfamiliar part of town, As you round a corner, you accidentally run into a man. He becomes angry and shoves you.	4. Taking a shower, alone in the house, I hear the sound of someone forcing the door, and I panic.	4. You have a part-time job at a restaurant. Your job is to call the names of the people whose tables are ready. One evening, you comment to a coworker about how attrac- tive you think somebody in the last group is. As you walk by the table, the group smiles at you and one man/ woman says, “I hear you think my friend is attractive.” You quickly realize that the microphone was on when you were tal…	13. My husband began complaining about how loud I snored, saying he couldn’t get enough sleep at night. I couldn’t believe it because I never woke up, and I would never do something that unpleasant. Then one morning, I came downstairs and heard the most awful noises coming from our stereo system. My husband has recorded my snoring and was playing back the tape on the stereo.
	6. You are at a store waiting to be helped, but the clerks are talking to each other and ignoring you.	14. Someone coming towards you does not dim their headlights at night	17. When I know I’m right, but the others say something else and I cannot prove I’m right.		5.I am fearful of what is happening	6. When you have a test	6. Winter	6. Upon leaving class, you notice that a police officer is removing your bike because it was illegally parked.	5. Discussed your relationship issues			2 Feelings of guilt related to child(ren)			15. Strangers	(6) You and someone you do not really know that well are standing around and talking in an empty parking lot. The acquaintance begins to shove and push you. You are unsure whether s/he (same sex as you,) is serious or just kidding around.	Standard neutral scenes	5. You have promised a friend that you would take her out to dinner for her birthday. A few nights beforehand, an attractive coworker, whom you have had your eye on, asks you out. You accept and ditch your friend with an excuse about being sick. The night after your date, your friend calls and says that she saw you in the window of a restaurant while she was on the way to get you a get-well card.…	16. Last night when I returned from work I found a beautiful flower arrangement on the porch. When my husband got home I ran up to him, flinging my arms around his neck, and thanked him for such a thoughtful and romantic gift. He seemed confused and smiled, and then told me that he had bought the flowers for us to take with us to a dinner party we had planned to attend.
	7. Your spouse/significant other doesn’t do something he/she promised he/she would take care of.	15. At night someone is driving right behind you with bright lights on	20. When I know I’m right and nobody listens to my arguments. I feel pushed around and nobody listens to me.		6.I have control over this situation	7. When you think you might make a mistake		7. You are hit by a car on your way to an important appointment, causing you to miss the appointment.	6. Ate a meal alone together			2.1 Termination of contact to child(ren)	“Having no contact to my daughter.”; “Haven’t seen my daughter for 25 years.”	6. I was hard on my friend.	20. People in authority	(7) You are outside in a park area at night when you see a menacing stranger with a knife about 30 ft away directly approaching you. It is obvious the person is planning to attack you.	1. I am relaxing on my living room couch looking out the window on a sunny autumn day.	6. You are shopping at a local grocery store. Because you are in a rush, you hurriedly are grabbing items off the shelf. Once you get to the produce section, you grab an apple off the top of the pile. The pile of apples topples, causing an avalanche of apples. You are left there, stand- ing, surrounded by apples with everyone looking at you and you have to tell a worker what you did.	17. Several weeks ago I was over at my boyfriend’s house talking to his mother. I was telling her how awful Miss Mellon, my Spanish teacher, was, and how much everyone hated her. When my boyfriend came into the room he got a weird look on his face after a minute, and asked me to come outside with him to help him get something out of the trunk of his car. Once we were outside he told me that I sho…
	8. Someone talks down/is condescending to you.	17. Someone speeds up when you try to pass them	30. In debates and discussions when you hear arguments that have already been refuted during the meeting (like irrelevant prejudice). In other words, stubborn arguing. Especially the stupidity and the fear of confessing to such mistakes, in spite of all counterevidence, still go on with more and more words.		7.I am overwhelmed by this situation	8. When you have to start a new activity		8. You arrange with a good friend to go out together, and he/she will contact you to meet each other. You don't hear from him/her.	7. Flirtatious conversation			2.2 Not spending (enough) time with child(ren)/Not taking (enough) care of child(ren)/not being there for child(ren)	“Not enough time spent with my child.”; “Going back to work soon after giving birth.”	7. I said bad things about my friend.	27. Being watched working	(8) You are alone as you exit an empty campus building late one night. Just as you get outside, you feel a hand grab your arm.	2. I am sitting in a lawn chair on the front porch watching the soft summer breeze sway the leaves on the trees.	7. You are researching a topic at the library in a competi- tive area of study. You realize that you have come across a crucial page in your reading. You decide discreetly to rip out the page so that no one else will be able to use the same information and so that your discussion will be unique. A librarian, however, catches you and demands that you buy the book and bans you from the library.	23. My sister, Sally, was always nagging me about how I cut bagels the wrong way, and that if I cut myself she wouldn’t run and help since she had told me so many times. I always told her to leave me along and that I was perfectly capable. Then one morning as we were hanging out in the kitchen before my parents were up, I was slicing a bagel for myself when the knife slipped, and I was bleeding a…
	9. Your family doesn’t take your education/career seriously.	20. Someone pulls our right in front of you when there is no one behind you	39. Discussions with a gang of buddies. Everybody’s against what I have said. I think they are completely wrong. And they say the most ridiculous things. And they get mad and start yelling. And when they won’t listen or understand. And all they do is yell.		8.I believe I can change this situation	9. When you go into a room full of people		9. On holiday with friends, you arrange that each, in turn, has to carry the heavy tent gear. One day, the tent gear is missing.	8. Talked about sex			2.3 Faults in education/misbehavior towards child(ren)	“Being too strict with my children.”; “Smoked in the presence of my children.”	8. I caused problems for my colleagues because of my actions.	33. Being criticized	(9) You are sleeping in bed during the night, but suddenly wake up thinking you have heard a suspicious noise. It is dark and you are alone.	3. Soft music is playing on the stereo as I snooze lazily on my favorite chair.	8. You call your girlfriend/boyfriend. You start talking about intimate things. She/he doesn’t respond but you keep on talking. After a long silence, you hear your boy- friend/girlfriend’s voice in the background asking who is on the phone. You realize that you are speaking to one of his/her parents.	26. I had a crush on a friend of mine named Jason. We were both on the track team, and we had arranged to meet on the school track early Saturday morning so he could help me with my form on the hurdles. When I got there, no one else was around, and as I walked up the school steps I heard someone call my name. Just as I turned and saw Jason, I lost my balance and tripped and fell on the steps. I w…
	1. You are involved in a group project and find out that one of your coworkers has not completed some of his/her responsibilities.	28. A cyclist is riding in the middle of the lane and slowing traffic	41. When somebody contradicts me when I know I’m right.		9.I am unprepared for this situation	10.When you go into a busy place		10. You are hit on your bike by another biker. He/she apologises, and proposes to pay back the damage to your bike.	9. Discussed romantic feelings for them			2.4 Certain living conditions of child(ren)	“My son is a child of divorce.”; “Children have to manage with little money.”	9. I ignored my friend.	41. Being rejected by others	(10) You are alone at home one night about to go to bed when the phone rings. You answer it, and there is an unfamiliar voice on the other end. It tells you that they are right outside of your house and hangs up.	4. I am lying on the sand on a warm day, listening to children playing down the beach, their soft voices mingling with the sound of the waves.	9. You are gathered with a group of your friends in your liv- ing room. One of your friends says he has to use the bathroom. You start talking about how you think the person who has left the room has become very con- ceited in recent weeks. While you are talking, your friend returns to the room unexpectedly and overhears what you are saying about him. You, seated with your back to the doorway, ca…	32. While I was having dinner with a senior colleague one evening, he told a very funny story which had me rolling with laughter. Just as the laughter was dying down, I took a big mouthful of food, and my colleague delivered another unexpected punchline. I could not control my laughter and the food came flying out of my mouth and nose.
	2. Your friend criticizes you in front of several other people.	Traffic obstructions	44. When somebody contradicts me and I know I’m right. They are not listening to me.		Concerns about outcomes	11.When you are approached by others		11. You have arranged for a hotel room with sea-view. Upon arrival, you are given a room without a sea-view.	10. Kissed on the lips			2.5 Other/unspecific reasons for feelings of guilt towards child(ren)	“I feel guilty, when I cannot keep my promises to my children.”; “Feelings of guilt towards my children.”	10. I stole something.	44. Feeling disapproved of	(11) Coming home one day, you find an unexpected shoebox-sized package waiting for you by the mailbox. As you sit down to open it, you notice a faint ticking sound that appears to come from inside the package.	5. I am lying in bed on a Sunday morning, half asleep and listening to the distant sound of bells, relaxing on my day off.	10. You are attending a formal party at your boss’ house. Ev- eryone present is very prominent in your workplace as well as your community. After getting punch, you head for the patio. As you stride toward the group outside, you slam into the sliding glass door that you thought was open, spilling the drink all over you. You hear the muted laughter and a few people ask you if you are all right.	33. I got home early from my date, and as I unlocked the front door to my apartment I heard my room-mate yell out something. I couldn’t make it out, and as I walked into the living room I saw her and her boyfriend clutching their clothes and scrambling into her bedroom.
	3. Your family criticizes a decision you’ve made.	19. You are stuck in a traffic jam	55. If you say 40, someone else says 70. When he says exactly the opposite.		10.I must succeed	12.When you volunteer to answer questions in class		12. You are in love with someone but he/she is more interested in someone else.	11. Had oral or penetrative sex			3 Feelings of guilt related to family (members)			47. Being ignored	(12) Alone at home one night, you have settled down to read a book when you hear some movement right outside of your window. You cannot see anything, but when you listen more closely, it sounds like people whispering.	6. A wood fire dances in the hearth, I feel snug and warm in the cabin, reading the book on my lap, enjoying a well-deserved rest.	11. You are taking a class with a friend’s girlfriend/boy- friend. You are studying late together one night for your social psychology midterm. One thing leads to another and suddenly you find yourself kissing. You agree that night never to discuss it again and not to tell your friend. However, a week later she/he finds out what happened between you two and asks, “How could you do some- thing lik…	Stranger
		22. You hit a deep pothole that was not marked	57. When somebody denies something I know I’m right about (often things you’ve heard on TV). That people don’t believe in me but persist in saying I’m wrong, though I almost can prove it. (But I am as obstinate as a mule myself).		11.I must perform well			13. You didn't study hard enough for an exam, and you fail the exam.				3.1 Termination of contact to family (members)	“No contact to family.”; “No contact to sister.”	Rule-breaking situation (RBS)	51. Making mistakes		Specific phobia	12. You are leaving class with an acquaintance you wish to impress. You think that the conversation is going well and you feel that the person is getting a good impres- sion of you. You are walking up to the door of the build- ing while turned around talking to this person. As you attempt to push the door, someone opens it and you fall flat on your face, in full view of the class. Everyone, in- c…	2. One day I walked into a large, well-attended class and sat down in the front row. After about ten minutes I realised that I was in the wrong class, so I had to get up and walk out in order not to miss the class I was scheduled to take.
		26. Driving behind a truck which has material flapping around in the back	60. If I say something I know is true and still nobody believes me. Then I get mad. It is the people that don’t believe me that makes me angry.		12.I knew this was coming			14. Your clock failed to wake you up in the morning and you miss the final class of a course.				3.2 Not spending (enough) time with family (members)/Not taking (enough) care of family (members)/not being there for family (members)	“Do not take enough care for my widowed mother.”; “Don’t have enough time for my family.”	12. I did something in my class that had nothing to do with the lesson.	52. Looking foolish		1. I feel tense all over and I fight back the tears as I walk past all the birds in the park; my eyes are closed and I feel so frightened I want to scream.	13. You brag to all of your friends that you are going to get a 4.0 for the next semester. You know full well that you are doing poorly but you figure that they will never find out. When you get your report card, you realize that you’ve done worse than you expected and are put on academic probation, which means that you are suspended for a se- mester. All of your friends realize that you must hav…	7. After paying for my purchases, I was leaving a packed, City Centre drugstore. I walked through the scanner at the door, and the alarm went off as if I were a shoplifter.
		30. Driving behind a vehicle that is smoking badly or giving off diesel fumes	Factor II: blaming, slandering, bullying, and telling tales		13.If I am not completely successful, I will fail			15. You arrange with your roommates that each in turn has to put out the garbage. When it someone else's turn, you noticed that he/she didn't clean up.				3.3 Misbehavior towards/bad thinking of family (members)	“I treated my parents disrespectfully.”; “Did hurt brother.”	13. I broke the rules and rode a bicycle with two people on it.	Agoraphobia Fears (AGO)		2. I tense my arms when I wait to receive the shot from the nurse to treat the spider bite; my heart races and my palms become sweaty.	14. You are assigned to give a presentation for class. You feel uncomfortable because of your Embarrass of speaking in front of large groups. You prepare intensely, reading your presentation aloud many times. You are very eager not to make any mistakes. During the presentation, you feel that things are going smoothly. However, while you are reading a statistic, you say “sex” instead of “six.” Mos…	12. I had gone by myself to see the recent crowded exhibit at the local art museum. After visiting the rest room I walked around the main gallery for about five minutes before a female security guard caught my attention as well as that of many other museum visitors by yelling, ``Ma’am!’’ and told me that my skirt was hitched up in back.
		31. A truck kicks up sand or gravel on the car you are driving	37. When somebody is bullied. I have been bullied myself and know how it feels. I get angry because you cannot help being different, having glasses or being oddly dressed.		14.I can make something productive			16. A floppy disk holding an important school assignment is destroyed by your computer.				3.4 Conflict/argument with family (members)	“Argument with my sister.”; “Conflicts with my parents.”	14. I crossed the road when the traffic signal was red.	2. Being alone		3. I feel closed in and like I am losing control as I sit in my car at the traffic light with cars all around me.	15. On your way to class, you have a few extra minutes and go into the local music store. You have no money but just want to kill some time. You are browsing through the CDs and see an album you have wanted for ages. You look around and think to yourself that nobody would notice if you put it into your bag. As you try to exit the store discretely, an alarm sounds and a security guard grabs you by…	14. I worked in the men’s department of a large department store. I had been with them for one month, so I was not familiar with some of the procedures. One day I had made a mistake and the floor manager yelled at me in front of the customers who were shopping at the time.
		32. Driving behind a large truck and you cannot see around it	40. When my brother has taken something from Mom and I am blamed because I’m the youngest one. That they accuse me though I didn’t take it.		15.I am not sure if I get a desirable outcome			17. You hear that a friend is spreading gossip about you.				3.5 Disappointing/belying expectations of family (members)	“My parents pay a lot of money for my university study, but I have bad grades.”; “Having disappointed my father.”	15. I broke one of the school rules.	3. Being in a strange place		4. My heart quickens and my veins constrict as the lab tech wraps the rubber band around my arm; my face is flushed and when I see the needle I begin to feel sick.	16. You are at a public beach and you feel like going for a swim. The waves are rough but there are other people swimming near you. As you dive in, you realize that your bathing suit has fallen down and that people are staring at you.	21. It was the first day of a new semester, and I was sitting in a large lecture course. I didn’t know anyone else in the class and I was thinking about other things going on in my life, and biting on the end of pen. Suddenly, some of the students around me started staring at me, and a few began to laugh. When I looked down I saw ink all over my hands, and after running to the bathroom, I saw my …
		33. You encounter road works and detours	47. If somebody blames me for doing something I have not done.		Avoidance of situation			18. You miss a popular party because you fall asleep at home.				3.6 Certain living conditions of family (members)	“Mother in nursing home.”; “Had to move far away because of my job – bad for family.”	16. I crossed railway tracks at a crossing when the signal was ringing.	6. Crossing streets		Social anxiety	17. You are at a friend’s birthday party. The party is very wild with a lot of loud music and drinking. Before you have realized it, you have had far too much to drink. You stumble outside and later your friends find you lying on the ground. They take you to the hospital, where you spend the night in the ER. You are released the next day. A month later, you receive a call from your mother ask- in…	22. I was the best man at my brother’s wedding. I got up at the reception to make the ceremonial toast. Half way through my brother leaned over to me and whispered, ``Your fly is open’’.
		Hostile gestures	48. I get angry when people talk behind my back, or someone else’s back. Because those who do so are so mean and such cowards that they don’t dare to tell me or somebody else directly.		16.I hope this situation goes away soon			19. You are fired from your holiday job.				3.7 Other/unspecific reasons for feelings of guilt towards family (members)	“Family matters.”; “Situation in family.”	17. I did not pay the full bus or train fare.	7. Falling		1. I’m jittery, with heart pounding and stomach knotted, as I scan the room full of people for the disapproving looks that I know will come when I do something wrong.	18. You are in a job interview. As you sit across the desk from the interviewer, you feel a wet spot on the seat of your pants. You wonder what you can do, not knowing how it happened. At the end of the interview, you stand up while trying to cover it up and exit quickly. However, the interviewer gets up to walk you to the door and obvi- ously notices the wet spot with a confused look.	27. As a prospective student, I visited the dining hall of one of the schools I most wanted to attend. The person who had been escorting me to classes had a prior engagement, so I decided to eat lunch on my own, and perhaps meet some new people. As I left the cafeteria line and walked into the large dining hall full of noisy college students, I slipped on some spilled ketchup and fell backwards. …
		21. Someone makes an obscene gesture towards you about your driving	49. When someone in my family has lost something, they always put the blame on me and think I took it. That they always think I am the one to blame.		17.I hope this situation will be over soon			20. A fellow student fails to return your notes when you need them for studying.				4 Feelings of guilt related to other people (not specifically spouse/partner, children or family members)			11. High places on land		2. As I wait to give my report on the conference call, I progressively feel nervous and unable to breathe; I put them on hold twice but still am unable to catch my breath.	19. You work part-time at a veteran’s nursing home. You have a hectic week of midterms so you consistently leave early from work but report that you have stayed your en- tire allotted time. You think nobody notices and, by the end of the semester, you have made a habit out of re- porting many more hours than you have actually worked. One afternoon your boss calls you in to what you think is a rou…	28. Four months after our first child was born I went back to work on a part-time basis, but I was still breast feeding her. One afternoon, I made a sales presentation to all of the employees of a large architectural firm that we hoped to snare as a new client. As I was speaking I caught a glance of myself in a mirror in the conference room; my blouse was wet, and I looked down to find that I had…
		24. Someone beeps at you about your driving	50. I get mad when my friends talk rubbish about me and I find out about it. I get terribly mad because when my friends say nasty things I feel out of it.		18.I hope time passes by faster			21. You bump into someone on the street.				4.1 Neglecting someone/not taking (enough) care of someone/not being there for someone	“I neglected a friend.“; “Supported friends not enough.“	19. I defied my parents.	17. Journeys by train		3. My voice quivers and I begin to hyperventilate as I give a speech in front of a large group of people who are watching me uneasily.	20. You are a waitress in a restaurant. You are known for being efficient and courteous. One of your professors comes in and sits in your section. You immediately wait on him and try to impress him. You quickly bring him his meal but trip and spill it all over him. He gets up, wipes it off, and gives you an annoyed look.	34. I was backstage at a local theatre where a performance was about to begin. There was a microphone set up backstage. I thought it was just a prop, so I paid no attention to it and stood nearby having a conversation with a friend. But it turned out that the mike was live and everyone in the theatre could hear our conversation.
		27. Someone shouts at you about your driving	53. When you’re kind to a friend and he is not. You want to be treated yourself the way you treat your friends.		19.I do not want to face this situation			22. You have a group assignment with some fellow students. They don't work hard, and you all get a bad grade.				4.2 Misbehavior towards/bad thinking of someone	“Taking advantage of people.”; “I said hurtful words to someone.”	20. I played until midnight without my parents' permission.	18. Journeys by bus		4. After rehearsal, I gather together with the other members of our church choir to talk; my face feels as if it is swelling, my heart races and I am unable to articulate ideas properly.	Study 2 (Embarrassment Scenarios similar to Study 1)	36. I recently attended my friend’s college graduation. I was sitting on one of those flimsy metal folding chairs. As I shifted my weight to get more comfortable the chair collapsed. I went crashing to the floor during the honorary degree recipient’s speech.
		Slow driving	56. When friends fall out and them, out of revenge, one of them is spreading false rumors. That they cannot have it out with each other instead. It is not nice to have to deal with rumors.		20.I want to run away from this situation			23. You're out for a drink after a hard day's work, and you have to wait 30 minutes before you are served.				4.3 Conflict/argument/communication problem with someone	“Argument with a person.”; “Argument with friends.”	21. I threw trash on the ground, not in a garbage can.	19. Journeys by car		Post-traumatic stress disorder	1. (1) You take a job and are in the process of moving into the office vacated by your predecessor. One of your coworkers, who happens to be the boss’ daughter, stops by and offers to help you. She helps you carry a box that you do not recognize and must have been left over from your predecessor. As she puts it down, the lid falls off. She hesitates and then picks up a pornographic magazine, feat…	Sticky Situation
		1. Someone does not move off straight away when the light turns green	Factor III: Insulting, disparaging, and depreciating behaviors		21.I am anxious about this situation			24. Your roommates went to the movies without informing you.				4.4 Disappointing/Belying expectations of someone	“Having disappointed someone.”; “Because of the feeling of not belying the expectations of others.”		23. Crowds		1. My heart beats faster as I hear the robbers in the front room; one of them shoots me and I want to scream.	2. (3) Your history professor has agreed to give your class a take-home essay exam so that you can be finished before finals week, provided that you won’t discuss the exam with anyone. Your roommate is in the same class and you both have discussed the class with each other and shared ideas before the exams were handed out. You both do your exams separately and you hand in the exam the next day. A…	5. I had been going out with a guy for about three months. I liked him, but I had been considering ending our relationship because he seemed much more serious about our staying together than I was. I hadn’t got round to bringing up the subject, though. One Friday afternoon I got home from class, and I found a message on my voice mail that he wanted me to go with him on Saturday to his home to mee…
		3. A pedestrian walks slowly across the middle of the street	1. When my pal had a book she wouldn’t show me. Because I think she has written something about me.		Negative appraisal							4.5 Not helping someone	“I promised someone to help moving, but then I didn’t do it.”; “Didn’t help a person, I was close to.”		24. Large open spaces		2. I panic, as the man starts toward me; my hands tremble and I feel dizzy; I want to get away.	3. (7) You are researching a topic at the library in a competitive area of study. You realize that you are missing a crucial page in your reading. You figure by the tear marks that someone must have ripped out the page so that no one else will be able to use the same information. After you return the book, you get a call from the library. The librarian says that you were the last one to have the …	6. There was a small grocery store where I used to buy almost all my groceries. The owners, Linda and Bob, were very friendly, and I always chatted with them when I went there. Whenever I came back from long vacations or other trips they’d always say ``Hi! It’s good to see you! We miss you!’’, and ask about my trip. But when a large supermarket opened nearby, I somehow ended up not going to Linda…
		4. Someone is driving too slowly in the outside lane, and holding up traffic	4. I get angry when one of the girls in my class is teasing me. It’s not fun to get mad, I think.		22.I want to give up							4.6 Feelings of guilt related to people at work (colleagues, employees, superiors, clients, customers etc.)	“Dispute with coworker.“; “I am not sufficiently available for all of my customers.”		35. Being in an elevator		3. My eyes water and my stomach is in a knot as I share a last cigarette with my best friend; I know he won’t survive his stomach wound, but I can’t leave him. My heart pounds as I lift the gun to shoot him in the head.	4. (11) You are taking a class with a friend’s girlfriend/boyfriend. You are studying late together one night for your social psychology midterm. Surprisingly, your friend’s girlfriend/boyfriend tries to kiss you just as your friend walks in the room. Your friend looks at you and asks, “How could you do something like that to me?” You are speechless and the conversation ends with your friend stor…	10. I suspected but I wasn’t sure that an employee I supervised was stealing from the petty cash box. It was clear that I was going to have to confront him.
		9. Someone is driving more slowly than is reasonable for the traffic flow	5. If a boy kicks a ball at me on purpose and everybody laughs, I get mad. He makes everyone laugh and then it hurts for a while.		23.I regret what I did just before this situation							5 Feelings of guilt related to animals1	“I was cruel to animals in my childhood.“; “The death of my she-dog last year.”		40. Enclosed places		4. While reading a book, I freeze as I hear someone forcing the door, my heart pounds, my body shakes and I feel nauseous.	5. (15) On your way to class, you have a few extra minutes and go into the local music store. You have no money but just want to kill some time. You are browsing through the CDs and pick one up. A friend of yours comes up to you and begins to talk to you. You do not realize it but you drop the CD in your book bag during your discussion with your friend. As you exit the store, an alarm sounds and …	11. The last time we were together, I thought I saw genital herpes lesions on my partner, but I wasn’t sure. This time I was going to have to ask him directly if it was herpes.
		10. A slow vehicle on a winding road will not pull over and let people pass	8. When somebody points to something wrong in another person and laughs at it.		24.This is not good							6 Feelings of guilt related to a subjectively perceived responsibility			42. Airplanes		Panic disorder with agoraphobia	6. (19) You work part-time at a veteran’s nursing home. You have a hectic week of midterms so you consistently leave early from work and you report this shortened time correctly on your time card. One day, you accidentally write 15 hours instead of 5. The next afternoon your boss calls you in to what you think is a routine meeting. She accuses you of taking advantage of her trust and abusing your…	20. I had lent my friend a large sum of money which he had not repaid. I suddenly found myself in a tight spot, and needed the money back in order to pay my rent, so I knew I was going to have to ask my friend to repay the loan.
		18. Someone is slow in parking and holds up traffic	12. When somebody insults me and says something unjustified. I feel Guilty and work myself up about the one who said it and want to really give it back to them.		25.I have no hope							6.1 For life (situations, events, circumstances) and death (circumstances) of others/for not being able to help/support	“I couldn’t prevent the suicide of my mother.”; “For the severe heart disease of my child.”		Injury Fears (INJ)		1. After jumping out of the car, I start to have a severe panic attack, I become clammy, I am in a knot, and I feel tense all over.	Study 3	25. I had already mailed my reply saying I would be attending my friend’s wedding, when I discovered my ex-girlfriend would also be attending.
		Police presence	24. When somebody (or myself) says something that she/he doesn’t mean at heart. It could be a compliment, a declaration of love. If I learn that somebody paid a compliment to me that was not honestly meant, you feel like a dumb conceited fool who would swallow anything and I get mad when I think of it.		26.I am not being rational							6.2 For own diseases/own disorders/own traumatic experiences	“I am sick too often.”; “Didn’t defend myself against being raped.“		1. Open wounds		2. My heart races and blood rushes to my head as I pull into the parking space; I approach the store with cautious steps, legs trembling, and I feel I must escape.	Type 1 - shameful flaw had been revealed (greater embarrassment)	31. My fiance had told me that her parents would neither approve of my career plans, nor appreciate my personal style. However, she wanted me to meet them, and so I agreed, even though she explained that they would probably not keep their disapproval to themselves.
		11. You see a police car watching traffic from a hidden position	Factor IV: foolish and thoughtless behaviors		27.I can have a favorable outcome							6.3 For surviving	“I survived cancer. Others are dying of it.“; “My brother died when he was a kid and I live.“		4. Dead people		3. My heart pounds, I feel nauseous, and I am shaking as I drive myself to the doctor; I am worried that I am going to die as I am unsure if I am sick or experiencing a panic attack.	1. You go to your local supermarket one afternoon. You are in the produce section standing next to a huge display of apples. Another shopper accidentally knocks the entire pile of apples off the display, sending them tumbling to the ground. He quickly glances at you but then runs away from the mess, leaving you to clean it up. As the stock person comes to clean up, you realize that he and the oth…	35. I had plans to go to dinner with a friend, but I know this person is very critical and vocal, and will not hesitate to make his complaints known to the waiter.
		16. You pass a speed camera	25. When I’m tired and busy with my homework and things go wrong I get mad. Because I’m tired and I think everything goes wrong.		Others’ evaluation							6.4 For having a better life than other people/Doing not enough against the problems on the world	“That I live at the expense of the people in the Third World.”; “Doing little for the environment.“		12. People with deformities		4. At the baseball park, I am walking and suddenly I feel an intense rush of fear; my heart is pounding, my breath is labored, and my stomach is in a knot.	2. You take a job and are in the process of moving into the office vacated by your predecessor. One of your coworkers, who happens to be the boss’ daughter, stops by and offers to help you. She helps you carry a box that you do not recognize and must have been left over from your predecessor. As she puts it down, the lid falls off. She hesitates and then picks up a pornographic magazine, featurin…	39. During my third date with someone whom I liked very much I found that I was again the person paying the check for dinner. I want to see this person again, but I don’t want to get stuck paying every time, so I will have to discuss this issue directly with the person.
		23. A police car is driving in traffic close to you	33. When everything goes wrong. I’m alone, there is no one else to blame. Something breaks down, no clean blouse to put on. I get mad at myself for not having washed that blouse etc. It’s my laziness and dullness I get mad at. If someone is there with me, for example, Mom, I will blame my laziness on her.		28.I am afraid of others thinking of me							7 Feelings of guilt related to religious beliefs (committing sins; misconduct in the eyes of God)1	“I broke God’s commandments.“; “Sins.”		14. Receiving injections		Control participants	8. You are taking a class with a friend’s girlfriend/boyfriend. You are studying late together one night for your social psychology midterm. One thing leads to another and suddenly you find yourself kissing. You agree that night never to discuss it again and not to tell your friend. However, a week later she/he finds out what happened between you two and asks, “How could you do something like tha…	40. After purchasing contact lenses I returned to the store to have them adjusted. When I returned a third time to have them readjusted I was told, ``Most people have trouble adjusting to them’’. But the lenses still aren’t comfortable so now I have to take them back yet again.
		29. A police officer pulls you over	36. When local tycoons, or people on the whole in high positions, abuse power. It is not the money that makes me mad but the fact that such idiots can have such high position.		29.Others see me as incompetent							8 Feelings of guilt related to certain circumstances			22. Seeing other people injected		1. I feel jittery when my brother tells me a tornado is coming. My heart races as the tornado passes over my house.	9. On your way to class, you have a few extra minutes and go into the local music store. You have no money but just want to kill some time. You are browsing through the CDs and pick one up. A friend of yours comes up to you and begins to talk to you. You do not realize it but you drop the CD in your book bag during your discussion with your friend. As you exit the store, an alarm sounds and a sec…	Centre of Attention
		Illegal driving	46. When I wake up and put on my sweater and I get it wrong. That I get my sweater all wrong.		30.I am making a bad impression on others							8.1 Being dependent on someone	“Living on my parents’ money.”; “Because always someone has to give me ride.“		32. Sick people		2. My heart races as my boyfriend punches my best friend in the nose. He hits him again and again. I want to scream.	Type 2 - a flaw was less reasonable (greater anger)	4. I took a class in creative writing. We had a writing assignment each week. The first two weeks we handed the assignments in and the instructor returned them with comments. But the third week of the course he decided to ask people to read their assignments out loud. He called on me to read mine.
		2. Someone is driving too fast for the road conditions	51. When the alarm has rung in the morning, but I stay in bad and fall asleep again. That I don’t have time to get ready in peace and quiet but have to fling my clothes on before leaving.		31.Everyone is watching me							8.2 Financial situation/debts/handling of finances	“I owed a friend money.”; “Credits.”		36. Witnessing surgical operations		3. My stomach is in a knot as my new car begins to hydroplane. My palms are clammy and my jaw is clenched as I lose control of the car.	3. You start a new job in an office. Things seem to be going well and you like your coworkers. One day, some petty cash goes missing from the cash box. You are all called into the conference room to discuss this urgent matter. Your boss accuses you of stealing the money simply because you are the newest person to join the company. You didn’t steal the money and he has no basis for this accusation…	9. I was attending a magic show with some friends. It was a packed auditorium, but we were sitting at the front, close to the stage. The magician said she needed an assistant from the audience for her next trick. She called on me to come up on stage and help.
		6. Someone is weaving in and out of traffic	54. When I had made a mistake in a test and don’t get time to correct it. When I know I made an error and cannot correct it in time.		32.Others are evaluating me negatively							8.3 Situation/problems at work	“I didn`t do my job properly.”; “Didn’t finish my work in time.”		38. Human blood		4. My heart races as I awake. A man is standing over my bed. I am screaming; I am afraid of dying.	4. Your history professor has agreed to give your class a take-home essay exam so that you can be finished before finals week, provided that you won’t discuss the exam with anyone. Your roommate is in the same class and you both have discussed the class with each other and shared ideas before the exams were handed out. You both do your exams separately and you hand in the exam the next day. A few…	15. I was attending a cocktail party where I didn’t know a lot of people. Just as I started to enter I heard an announcement that the guest of honour was arriving, and a spotlight was turned on the door. It followed my entrance instead of that of the real guest of honour who was just behind me.
		13. Someone runs a red light or stop sign	59. When I see how they ruin a beautiful place where there are farms and they suddenly appear with Caterpillars and say they will build houses there. Because I think you should preserve existing green areas and not build skyscrapers there.		33.I will fail							8.4 Unemployment/incapacity for work/early retirement	“Lost my job.”; “Because I’m unemployed and don’t find a job.”		39. Animal blood			6. You are researching a topic at the library in a competitive area of study. You realize that you are missing a crucial page in your reading. You figure by the tear marks that someone must have ripped out the page so that no one else will be able to use the same information. After you return the book, you get a call from the library. The librarian says that you were the last one to have the book…	18. As I entered my apartment on my birthday, 25 people yelled ``SURPRISE!!!’’
		25. Someone is driving well above the speed limit	Factor V: teasing		Specific scenario							9 Feelings of guilt related to misconduct/mistakes being made			43. Medical odors			7. You are living in the college dorm during your freshman year. Recently, you have noticed that people are whispering and smirking when you walk by. You finally confront one of your friends and ask why people are talking about you like that. Reluctantly, she tells you that she heard you had a contagious venereal disease. You are shocked and ask where she heard this because it is untrue. She info…	19. At the annual company picnic the boss usually gives a speech to his workers about the company’s accomplishments of the past year and his goals for the future. This year I was listening to the speech with some co-workers when the boss mentioned my name, told me to stand up, and thanked me specifically for my hard work and dedication.
			19. I get very mad when a friend teases me and somebody else joins him although it’s none of his business.		34.having an important job interview							9.1 Stealing something	“Stole a toy from my cousin.”; “Stole something from a store, when I was a kid.”		46. Cemeteries			Type 3 - an offense that someone else exacerbated (no expectation)	24. I was going through the check-out line at K-Mart when balloons started flying, horns started blaring, and someone came over and asked me to come and stand under a spot light. They announced over the PA system that I was their 1,000,000th customer and would get a free TV.
			21. When I am teased. Seeing laughing faces who are having fun at someone else’s expense. I think teasing is very foolish and unnecessary.		35.having an argument with a friend							9.2 Criminal acts/infringement (not or not specifically stealing)	“Criminal behaviour.”; “Fraud.”		50. Doctors			5. You are walking down a flight of stairs after class. You see your ex-girlfriend/boyfriend at the bottom of the stairs with their new partner (who she/he recently dumped you for). You are distracted by this and trip on a step and fall down, spilling your notes everywhere. Upon seeing this, your ex-girlfriend/boyfriend begins laughing hysterically. You hear him/her saying to their partner, “That…	29. On the evening of my birthday, some friends of mine took me to dinner at Houlihan’s. The place was packed. We were all having a good time and were waiting for dessert. Suddenly I saw five waiters and waitresses coming toward me with a cake and candles. They started singing, ``Happy Birthday!!’’.
			43. When they tease me and call me fatty.		36.having an argument with a friend having an emergency surgery							9.3 Telling lies/withholding truth/information	“Lied to my best friend.”; “Concealment of an event that has taken place and subsequent lies.”		Sex Aggression Fears (SEX)			10. You work part-time at a veterans’ nursing home. You have a hectic week of midterms so you consistently leave early from work and you report this shortened time correctly on your time card. One day, you accidentally write 15 hours instead of 5. The next afternoon your boss calls you in to what you think is a routine meeting. She accuses you of taking advantage of her trust and abusing your pos…	30. I was sitting in a large lecture class. In the middle of the lecture some members of the college acappella singing group came into the hall. They said, ``excuse me Professor, but we have a very important message for one of your students`. . . `` It was me they named; I had to raise my hand and tell them where I was. Then they sang a Valentine’s medley to me.
			58. I get mad when my brother teases me. He is teasing me for very foolish and ridiculous reasons.									9.4 Betraying someone/being indiscrete/committing a breach of confidence	“Gave away a secret.”; “Betrayal.”		25. One person bullying another				37. I was sitting in a large class one day when the professor volunteered me to help him demonstrate an experiment in front of the class.
			Factor VI: frustration (people in control)									9.5 Self-inflicted accidents/damages	“Self-inflicted car accident.”; “Car accident – talked too much as co-driver – driver was distracted.”		26. Tough-looking people				38. I was at my high school graduation when the winner of the high school citizen of the year award was announced. It was me. So I had to walk to the front of the auditorium to receive the award.
			2. When you want to “pop out” one evening and you’re not allowed to, though you have a holiday from school the next day, and you get no explanation why. Because you’re not getting a sensible answer.									9.6 Other/unspecific misconduct/mistakes being made	“Behaved unethically.”; “Misconduct.”		28. Dirt
			7. When I am not allowed to answer the phone. Mother wants to do it.									10 Feelings of guilt related to decisions (having made bad/ wrong decisions; regretting decisions; being uncertain about decisions)1	“I made the wrong decision concerning my profession.“; “Abortion.”		30. Sight of fighting
			16. When you’re not allowed to go somewhere you’ve intended to, for example, out into the country. You get disappointed because you’ve been looking forward to it. When you must not do a thing you want, you get cross.									11 Feelings of guilt related to negative self-attributions/flaws			31. Ugly people
			35. Parents who misunderstand. You must be home at fixed times and like that. That I can’t do what I want to.									11.1 Not achieving something/failure	“I do not make something of my life (abandoned several study programs, no vocational training….”; “I didn’t finish my dissertation.”		34. Strange shapes
			52. I had planned to go to the Canary Islands with my boyfriend and his mother. But my mother didn’t let me go.									11.2 Procrastination/waste of time/being lazy/inactive/powerless/ unmotivated	“Didn’t help enough with the housework.”; “Procrastination concerning important tasks.”		48. Nude men
			Factor VII: nagging, yelling, and quarreling situations									11.3 Unfavourable health behavior/self-indulgence	“I do smoke.”; “I don’t take enough care for my body.”		49. Nude women
			3. When I’m tired and slept too little and everybody just keeps nagging at me at home. I get put out and would rather have peace and quiet.									11.4 Being unable to cope with something	“Cannot handle the disease of my husband.”; “My son – 17 – has Asperger’s syndrome. Because of him, I am often stretched to my limits. Sometimes, I would like to put him into a facility.”		Fear of Harmless Animals (ANI)
			27. When somebody takes his bad morning mood out on me. It’s none of my business. I think that people who are in bad temper don’t necessarily have to let it come out on other people, it if isn’t necessary.									11.5 Being unpunctional/unreliable/forgetful	“Unpunctuality.”; “Forgetting important things/appointments.”		13. Worms
			38. When Mom and I are quarreling. She is only interested in small matters. And I lost my patience right away.									11.6 Being selfish/egoistic/egocentric	“Egoism.”; “I am too self-centered.”		16. Bats
			45. When somebody yells and shouts at you, nagging about everything. It is enough to say something once, and then you grasp it.									11.7 Being not empathetic	“Not enough empathy.”; “Lack of empathy.”		21. Flying insects
			Factor VIII: physical harassment and assault									11.8 Being unfair	“Being not fair.”; “Unfairness.”		29. Crawling insects
			14. When my little brother runs in and out of our room when I have friends at home. He is only running to make me mad; he wants to tease me.									11.9 Being envious/jealous	“Being joyful, when I have better grades than my fellow students.”; “Sibling jealousy.”		37. Mice
			18. When somebody sets up on people (physically) and they can not defend themselves.									11.10 Being impulsive/angry	“Being impulsive against certain people.”; “When I sometimes got hot-tempered and thus couldn’t control myself.”		45. Harmless snakes
			23. When my brother hits me without reason and I ask him why and he only laughs at me. When he’s laughing when I ask why.									11.11 Being anxious	“Fears of failure.”; “Being anxious.”
			28. I get angry when my two brothers kick up a row with me. They do it when Mom and Dad are gone. When they hit my belly, it hurts so that I get mad and hit back, but then they hit me even harder.									11.12 Being dissatisfied	“Dissatisfaction.”; “Self-inflicted dissatisfaction.”
			Factor IX: frustration (environmental and vague)									11.13 Other/unspecific negative self-attributions/flaws	“Having been naïve and trustful.”; “Personality.”
			13. When I had no ice cream. Everybody except me had ice cream.									12 General, unspecific, or vaguely formulated reasons for feelings of guilt1	“General reasons.”; “Life in general.”
			34. When you see a film ad in the paper and take the bus there, and there is no film. Your trip there has been meaningless.
			42. When you are about to go to a place you’ve been looking forward to seeing and the car breaks down. When the car is broken down and you’re halfway, I usually get terribly mad.
			Factor X: with people's belongings
			10. When they "pinch" things. When you bought something expensive.
			26. When somebody destroys something forme (something new); especially if on purpose. That he doesn’t take notice that something was broken or was destroyed.
			31. I get mad when I’m at home because they are moving my things all the time. They are gone and not where I put them in the first place.
			Others: below the crucial 0.50 loading
			22. When you are building a fireplace. You tell a friend to take that stone, no, not that one, and so you go on for a while. That he cannot see which stone I’m pointing to.
			29. When somebody is jostling and shoving in the bus or in the subway. Because you’re in a hurry.
			32. When I get a bad result on a test. You studied a lot prior to the test and when you see the results, you get mad.
